# Supplementary material for: Molecular Epidemiology and Characterization of Carbapenem-Resistant Klebsiella pneumoniae Isolated from Urine at a Teaching Hospital in Taiwan
Source: PubMed Central journal article supplement (PMC7911515; doi:10.3390/microorganisms9020271), 2021-01-28
Supplement: microorganisms-09-00271-s001.pdf [file microorganisms-09-00271-s001.pdf]

**Table S1.** Primers used for the determination of multilocus sequence type (MLST) in this study

| Gene name   | Primer name | Sequences (5' to 3' end)       | Amplicon size | References |     |
|-------------|-------------|--------------------------------|---------------|------------|-----|
| <i>gapA</i> | gapA-F      | TGAAATATGACTCCACTCACGG         | 662           | [1]        |     |
|             | gapA-R      | CTTCAGAAGCGGCTTTGATGGCTT       |               |            |     |
| <i>infB</i> | infB-F      | CTCGCTGCTGGACTATATTCG          | 462           |            |     |
|             | infB-R      | CGCTTTCAGCTCAAGAACTTC          |               |            |     |
| <i>mdh</i>  | mdh-F       | CCCAACTCGCTTCAGGTTTCAG         | 756           |            |     |
|             | mdh-R       | CCGTTTTTCCCCAGCAGCAG           |               |            |     |
| <i>pgi</i>  | pgi-F       | GAGAAAAACCTGCCTGTACTGCTGGC     | 718           |            |     |
|             | pgi-R       | CGCGCCACGCTTATAGCGGTTAAT       |               |            |     |
| <i>phoE</i> | phoE-F      | ACCTACCGCAACACCGACTTCTTCGG     | 602           |            |     |
|             | phoE-R      | TGATCAGAAGTGGTAGGTGAT          |               |            |     |
| <i>rpoB</i> | rpoB-F      | GGCGAAATGGCWGAGAACCA           | 1075          |            |     |
|             | rpoB-R      | GAGTCTTCGAAGTTGTAACC           |               |            |     |
| <i>wzi</i>  | wzi_for2    | GTGCCGCGAGCGCTTTCTATCTGGTATTCC | 580           |            | [2] |
|             | wzi_rev     | GAGAGCCACTGGTTCAGAAAYTTSACCGC  |               |            |     |

**Table S2.** Primers used for the detection of carbapenemases and extended-spectrum  $\beta$ -lactamases in this study

| Gene name                                                 | Primer name        | Sequences (5' to 3' end) | Amplicon size (bp) | References |     |
|-----------------------------------------------------------|--------------------|--------------------------|--------------------|------------|-----|
| Primers for carbapenemases                                |                    |                          |                    |            |     |
| <i>bla</i> <sub>IMP</sub>                                 | IMP-F              | GGAATAGAGTGGCTTAAAYTCTC  | 233                | [3]        |     |
|                                                           | IMP-R              | GGTTTAAAYAAAACAACCACC    |                    |            |     |
| <i>bla</i> <sub>VIM</sub>                                 | VIM-F              | CCGATGGTGTGGTTCGC        | 397                |            |     |
|                                                           | VIM-R              | CGGTCCAATGCGCAGCAC       |                    |            |     |
| <i>bla</i> <sub>OXA-48</sub>                              | OXA-F              | CCCAATAGCTTGATCGCCC      | 466                |            |     |
|                                                           | OXA-R              | CATCAAGTTC AACCCAACCG    |                    |            |     |
| <i>bla</i> <sub>KPC</sub>                                 | KPC-Fm             | CGTCTAGTTCTGCTGTCTTGTC   | 798                |            |     |
|                                                           | KPC-Rm             | CTTGTCATCCTTGTTAGGCGC    |                    |            |     |
| <i>bla</i> <sub>NDM</sub>                                 | NDM1-F             | ATGGAATTGCCCAATATTATGC   | 813                |            | [4] |
|                                                           | NDM1-R             | TCAGCGCAGCTTGTCGGC       |                    |            |     |
| Primers for TEM, SHV, CTX-M-group 1, 2, 9, 8/25, CMY, DHA |                    |                          |                    |            |     |
| <i>bla</i> <sub>TEM</sub>                                 | MultiTSO-T_for     | CATTTCCGTGTCGCCCTTATTC   | 800                | [5]        |     |
|                                                           | MultiTSO-T_rev     | CGTTCATCCATAGTTGCCTGAC   |                    |            |     |
| <i>bla</i> <sub>SHV</sub>                                 | MultiTSO-S_for     | AGCCGCTTGAGCAAATTA AAC   | 713                |            |     |
|                                                           | MultiTSO-S_rev     | ATCCCGCAGATAAATCACCAC    |                    |            |     |
| <i>bla</i> <sub>CTX-M-gp1</sub>                           | MultiCTXMGp1_for   | TTAGGAARTGTGCCGCTGYA     | 688                |            |     |
|                                                           | MultiCTXMGp1-2_rev | CGATATCGTTGGTGGTRCCAT    |                    |            |     |
| <i>bla</i> <sub>CTX-M-gp2</sub>                           | MultiCTXMGp2_for   | CGTTAACGGCACCATGAC       | 404                |            |     |
|                                                           | MultiCTXMGp1-2_rev | CGATATCGTTGGTGGTRCCAT    |                    |            |     |
| <i>bla</i> <sub>CTX-M-gp9</sub>                           | MultiCTXMGp9_for   | TCAAGCCTGCCGATCTGGT      | 561                |            |     |
|                                                           | MultiCTXMGp9_rev   | TGATTCTCGCCGCTGAAG       |                    |            |     |
| <i>bla</i> <sub>CTX-M-gp8/25</sub>                        | CTX-Mg8/25_for     | AACRCRCAGACGCTCTAC       | 326                |            |     |
|                                                           | CTX-Mg8/25_rev     | TCGAGCCGGAASGTGYAT       |                    |            |     |
| <i>bla</i> <sub>DHA</sub>                                 | MultiCaseDHA_for   | TGATGGCACAGCAGGATATTC    | 997                |            |     |
|                                                           | MultiCaseDHA_rev   | GCTTTGACTCTTTCGGTATTCG   |                    |            |     |
| Gene name                                                 | Primer name        | Sequences (5' to 3' end) | Amplicon size (bp) | References |     |
| <i>bla</i> <sub>CMY</sub>                                 | MultiCaseCIT_for   | CGAAGAGGCAATGACCAGAC     | 538                | [5]        |     |
|                                                           | MultiCaseCIT_rev   | ACGGACAGGGTTAGGATAGY     |                    |            |     |

**Table S3.** Primers used for genes of outer membrane proteins and for the detection of gene expression levels in this study

| Gene name               | Primer name | Sequences (5' to 3' end)   | Amplicon size (bp) | References |
|-------------------------|-------------|----------------------------|--------------------|------------|
| Outer membrane proteins |             |                            |                    |            |
| <i>ompK35</i>           | ompK35for   | AACTTATTGACGGCAGTGGC       | 1,132              | [6]        |
|                         | ompK35rev   | TTGGTAAACGATACCCACGG       |                    |            |
| <i>ompK36</i>           | ompK36for   | GCAGTGGCATAATAAAAGGCA      | 1,144              |            |
|                         | ompK36rev   | ACTGGTAAACCAGGCCCA         |                    |            |
| Gene expression levels  |             |                            |                    |            |
| <i>acrB</i>             | acrBF       | CGATAACCTGATGTACATGTCC     | 206                | [7]        |
|                         | acrBR       | CCGACAACCATCAGGAAGCT       |                    |            |
| <i>oqxB</i>             | oqxB1806F   | GAGCGAGATCGGGATGAATAC      | 84                 | [8]        |
|                         | oqxB1890R   | CGGCGTGTGGTGAACGTG         |                    |            |
| <i>ramA</i>             | ramAF       | ATCGTCGAGTGGATTGATGA       | 85                 | [9]        |
|                         | ramAR       | AGATGCCATTTCGAATACCC       |                    |            |
| <i>rpoB</i>             | rpoBF       | AAGGCCGAATCCAGCTTGTTTCAGC  | 147                | [7]        |
|                         | rpoBR       | TGACGTTGCATGTTTCGCACCCATCA |                    |            |

## References

1. Diancourt, L.; Passet, V.; Verhoef, J.; Grimont, P.A.; Brisse, S. Multilocus sequence typing of *Klebsiella pneumoniae* nosocomial isolates. *J Clin Microbiol* **2005**, *43*, 4178-4182, doi:10.1128/JCM.43.8.4178-4182.2005.
2. Brisse, S.; Passet, V.; Haugaard, A.B.; Babosan, A.; Kassis-Chikhani, N.; Struve, C.; Decre, D. wzi Gene sequencing, a rapid method for determination of capsular type for *Klebsiella* strains. *J Clin Microbiol* **2013**, *51*, 4073-4078, doi:10.1128/JCM.01924-13.
3. Poirel, L.; Walsh, T.R.; Cuvillier, V.; Nordmann, P. Multiplex PCR for detection of acquired carbapenemase genes. *Diagn Microbiol Infect Dis* **2011**, *70*, 119-123, doi:10.1016/j.diagmicrobio.2010.12.002.
4. Huang, T.W.; Chen, T.L.; Chen, Y.T.; Lauderdale, T.L.; Liao, T.L.; Lee, Y.T.; Chen, C.P.; Liu, Y.M.; Lin, A.C.; Chang, Y.H., et al. Copy Number Change of the NDM-1 sequence in a multidrug-resistant *Klebsiella pneumoniae* clinical isolate. *PloS one* **2013**, *8*, e62774, doi:10.1371/journal.pone.0062774.
5. Dallenne, C.; Da Costa, A.; Decre, D.; Favier, C.; Arlet, G. Development of a set of multiplex PCR assays for the detection of genes encoding important beta-lactamases in Enterobacteriaceae. *The Journal of antimicrobial chemotherapy* **2010**, *65*, 490-495, doi:10.1093/jac/dkp498.
6. Landman, D.; Bratu, S.; Quale, J. Contribution of OmpK36 to carbapenem susceptibility in KPC-producing *Klebsiella pneumoniae*. *Journal of medical microbiology* **2009**, *58*, 1303-1308, doi:10.1099/jmm.0.012575-0.
7. Doumith, M.; Ellington, M.J.; Livermore, D.M.; Woodford, N. Molecular mechanisms disrupting porin expression in ertapenem-resistant *Klebsiella* and *Enterobacter* spp. clinical isolates from the UK. *The Journal of antimicrobial chemotherapy* **2009**, *63*, 659-667, doi:10.1093/jac/dkp029.
8. Bialek-Davenet, S.; Lavigne, J.P.; Guyot, K.; Mayer, N.; Tournebize, R.; Brisse, S.; Leflon-Guibout, V.; Nicolas-Chanoine, M.H. Differential contribution of AcrAB and OqxAB efflux pumps to multidrug resistance and virulence in *Klebsiella pneumoniae*. *The Journal of antimicrobial chemotherapy* **2015**, *70*, 81-88, doi:10.1093/jac/dku340.
9. Veleba, M.; Higgins, P.G.; Gonzalez, G.; Seifert, H.; Schneiders, T. Characterization of RarA, a novel AraC family multidrug resistance regulator in *Klebsiella pneumoniae*. *Antimicrobial agents and chemotherapy* **2012**, *56*, 4450-4458, doi:10.1128/AAC.00456-12.
